# Supplementary material for: Social Bonds and Exercise: Evidence for a Reciprocal Relationship
Source: PubMed Central journal article supplement (PMC4552681; doi:10.1371/journal.pone.0136705), 2015-08-28

**S1 Fig. Modified IOS Scale**

Please circle the picture that best describes your relationship to the other participants in your group.

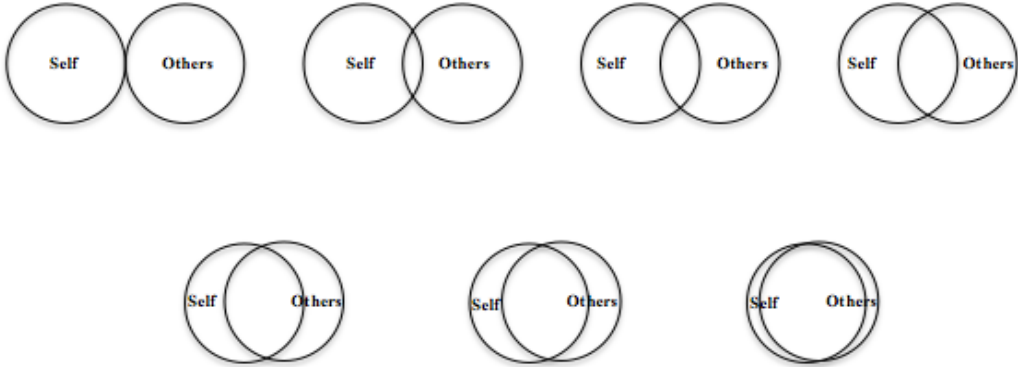

Supplement: pone.0136705.s005.pdf [file pone.0136705.s005.pdf]
