# Supplementary material for: Social Bonds and Exercise: Evidence for a Reciprocal Relationship
Source: PubMed Central journal article supplement (PMC4552681; doi:10.1371/journal.pone.0136705), 2015-08-28
Supplement: pone.0136705.s006.pdf [file pone.0136705.s006.pdf]

**S1 Table. Number of Participants Rowing with Confederate by Experimental Condition**

| Rowed with Confederate | Experimental Condition        |                           |                                    |                                | Total |
|------------------------|-------------------------------|---------------------------|------------------------------------|--------------------------------|-------|
|                        | Low Intensity / Non-synchrony | Low Intensity / Synchrony | Moderate Intensity / Non-synchrony | Moderate Intensity / Synchrony |       |
| No                     | 12                            | 3                         | 6                                  | 15                             | 36    |
| Yes                    | 6                             | 14                        | 10                                 | 2                              | 32    |
