# Supplementary material for: Social Bonds and Exercise: Evidence for a Reciprocal Relationship
Source: PubMed Central journal article supplement (PMC4552681; doi:10.1371/journal.pone.0136705), 2015-08-28
Supplement: pone.0136705.s007.pdf [file pone.0136705.s007.pdf]

**S2 Table. Rowing Intensity Manipulation by Condition****Low Intensity / Non-synchrony**

|               | 0-5 min. | 5-10 min. | 10-15 min. | 15-20 min. | 20-25 min. | 25-30 min. |
|---------------|----------|-----------|------------|------------|------------|------------|
| Participant A | 18 SPM   | 16.5 SPM  | 15 SPM     | 18 SPM     | 16.5 SPM   | 15 SPM     |
| Participant B | 16.5 SPM | 15 SPM    | 18 SPM     | 16.5 SPM   | 15 SPM     | 18 SPM     |
| Participant C | 15 SPM   | 18SPM     | 16.5 SPM   | 15 SPM     | 18 SPM     | 16.5 SPM   |

**Low Intensity / Synchrony**

|               | 0-5 min. | 5-10 min. | 10-15 min. | 15-20 min. | 20-25 min. | 25-30 min. |
|---------------|----------|-----------|------------|------------|------------|------------|
| Participant A | 18 SPM   | 16.5 SPM  | 15 SPM     | 18 SPM     | 16.5 SPM   | 15 SPM     |
| Participant B | 18 SPM   | 16.5 SPM  | 15 SPM     | 18 SPM     | 16.5 SPM   | 15 SPM     |
| Participant C | 18 SPM   | 16.5 SPM  | 15 SPM     | 18 SPM     | 16.5 SPM   | 15 SPM     |

**Moderate Intensity / Non-synchrony**

|               | 0-5 min. | 5-10 min. | 10-15 min. | 15-20 min. | 20-25 min. | 25-30 min. |
|---------------|----------|-----------|------------|------------|------------|------------|
| Participant A | 24 SPM   | 22 SPM    | 26 SPM     | 24 SPM     | 22 SPM     | 26 SPM     |
| Participant B | 22 SPM   | 26 SPM    | 24 SPM     | 22 SPM     | 26 SPM     | 24 SPM     |
| Participant C | 26 SPM   | 24 SPM    | 22 SPM     | 26 SPM     | 24 SPM     | 22 SPM     |

**Moderate Intensity / Synchrony**

|               | 0-5 min. | 5-10 min. | 10-15 min. | 15-20 min. | 20-25 min. | 25-30 min. |
|---------------|----------|-----------|------------|------------|------------|------------|
| Participant A | 24 SPM   | 22 SPM    | 26 SPM     | 24 SPM     | 22 SPM     | 26 SPM     |
| Participant B | 24 SPM   | 22 SPM    | 26 SPM     | 24 SPM     | 22 SPM     | 26 SPM     |
| Participant C | 24 SPM   | 22 SPM    | 26 SPM     | 24 SPM     | 22 SPM     | 26 SPM     |
