# Supplementary material for: Social Bonds and Exercise: Evidence for a Reciprocal Relationship
Source: PubMed Central journal article supplement (PMC4552681; doi:10.1371/journal.pone.0136705), 2015-08-28
Supplement: pone.0136705.s008.pdf [file pone.0136705.s008.pdf]

**S3 Table. Results of Shapiro-Wilk Tests on PGG Response Data by Condition**

| Experimental Condition           | <i>W</i> | df | <i>p</i> |
|----------------------------------|----------|----|----------|
| Low Intensity/Non-Synchrony      | .880     | 18 | .027     |
| Low Intensity/Synchrony          | .885     | 17 | .039     |
| Moderate Intensity/Non-Synchrony | .819     | 16 | .004     |
| Moderate Intensity/Synchrony     | .800     | 17 | .003     |
