# Supplementary material for: Social Bonds and Exercise: Evidence for a Reciprocal Relationship
Source: PubMed Central journal article supplement (PMC4552681; doi:10.1371/journal.pone.0136705), 2015-08-28
Supplement: pone.0136705.s009.pdf [file pone.0136705.s009.pdf]

**S4 Table. Results of Censored Regression with Intensity × Synchrony Interaction**

| Variable              | Coeff. | SE   | Z     | p    | 95% CI       |
|-----------------------|--------|------|-------|------|--------------|
| Intercept             | 3.68   | 1.37 | 2.69  | .007 | 1.00 – 6.36  |
| Intensity             | 0.98   | 1.13 | 0.87  | .386 | -1.24 – 3.20 |
| Synchrony             | -0.83  | 1.13 | -0.74 | .461 | -3.04 – 1.38 |
| Intensity × Synchrony | 1.31   | 1.76 | 0.74  | .458 | -2.15 – 4.77 |
| Mixed Sex Group       | 0.25   | 1.06 | 0.24  | .813 | -1.82 – 2.32 |
| Prior Knowledge       | -0.38  | 0.47 | -0.82 | .414 | -1.31 – 0.54 |

Log-likelihood:  $\chi^2(129) = -116.88$ ; Model Fit:  $\chi^2(5) = 7.23$ ,  $p = .204$ ;  $R^2 = .03$  (McFadden's)
