# Supplementary material for: Social Bonds and Exercise: Evidence for a Reciprocal Relationship
Source: PubMed Central journal article supplement (PMC4552681; doi:10.1371/journal.pone.0136705), 2015-08-28
Supplement: pone.0136705.s010.pdf [file pone.0136705.s010.pdf]

**S5 Table. Results of Censored Regression without Intensity × Synchrony Interaction**

| Variable        | Coeff. | SE   | Z     | <i>p</i> | 95% CI       |
|-----------------|--------|------|-------|----------|--------------|
| Intercept       | 3.11   | 1.12 | 2.78  | .005     | 0.92 – 5.30  |
| Intensity       | 1.63   | 0.75 | 2.19  | .029     | 0.17 – 3.09  |
| Synchrony       | -0.20  | 0.74 | -0.27 | .790     | -1.64 – 1.24 |
| Mixed Sex Group | 0.69   | 0.89 | 0.78  | .437     | -1.05 – 2.43 |
| Prior Knowledge | -0.43  | 0.46 | -0.95 | .34      | -1.33 – 0.46 |

Log-likelihood:  $\chi^2(130) = -117.15$ ; Model Fit:  $\chi^2(4) = 6.68$ ,  $p = .154$ ;  $R^2 = .03$  (McFadden's)
