# Supplementary material for: Social Bonds and Exercise: Evidence for a Reciprocal Relationship
Source: PubMed Central journal article supplement (PMC4552681; doi:10.1371/journal.pone.0136705), 2015-08-28
Supplement: pone.0136705.s011.pdf [file pone.0136705.s011.pdf]

**S6 Table. Results of Bondedness Factor ANCOVA**

| Variable              | Coeff. | SE   | <i>t</i> | <i>p</i> | 95% CI       |
|-----------------------|--------|------|----------|----------|--------------|
| Intercept             | -0.19  | 0.30 | -0.65    | .521     | -0.79 – 0.40 |
| Intensity             | 0.01   | 0.35 | 0.04     | .969     | -0.69 – 0.71 |
| Synchrony             | -0.11  | 0.35 | -0.31    | .757     | -0.80 – 0.59 |
| Intensity × Synchrony | 0.08   | 0.53 | 0.15     | .882     | -0.98 – 1.14 |
| Mixed Sex Group       | 0.80   | 0.32 | 2.48     | .016     | 0.16 – 1.44  |
| Prior Knowledge       | 0.22   | 0.14 | 1.56     | .125     | -1.37 – 0.50 |

$R^2 = .18$
