# Supplementary material for: Social Bonds and Exercise: Evidence for a Reciprocal Relationship
Source: PubMed Central journal article supplement (PMC4552681; doi:10.1371/journal.pone.0136705), 2015-08-28
Supplement: pone.0136705.s012.pdf [file pone.0136705.s012.pdf]

**S7 Table. Results of Bondedness Factor ANCOVA – Supplement**

---

| Variable                    | Coeff. | SE   | <i>t</i> | <i>p</i> | 95% CI       |
|-----------------------------|--------|------|----------|----------|--------------|
| Intercept                   | -0.16  | 0.29 | -0.54    | .592     | -0.74 – 0.43 |
| Intensity                   | 0.23   | 0.27 | 0.86     | .396     | -0.30 – 0.76 |
| Synchrony                   | -0.24  | 0.27 | -0.31    | .369     | -0.77 – 0.29 |
| Mixed Sex Group             | 0.45   | 0.42 | 1.06     | .293     | -0.40 – 1.29 |
| Intensity × Mixed Sex Group | -0.74  | 0.64 | -1.16    | .252     | -2.03 – 0.54 |
| Prior Knowledge             | 0.19   | 0.14 | 1.32     | .191     | -0.10 – 0.47 |

---

$R^2 = .19$

---
